# Supplementary material for: Multivariate Optimization of Tenax TA-Thermal Extraction for Determining Gaseous Phase Organophosphate Esters in Air Samples
Source: PubMed Central journal article supplement (PMC6399288; doi:10.1038/s41598-019-40119-2), 2019-03-04
Supplement: 41598_2019_40119_MOESM1_ESM.pdf [file 41598_2019_40119_MOESM1_ESM.pdf]

## **Supplementary Information for;**

### **Multivariate Optimization of Tenax TA-Thermal Extraction for Determining Gaseous Phase Organophosphate Esters in Air Samples**

Julius Matsiko,<sup>1,2</sup> Honghua Li,<sup>1</sup> Pu Wang,<sup>1</sup> Huizhong Sun,<sup>1,2</sup> Shucheng Zheng,<sup>1,2</sup> Dou

Wang,<sup>1,2</sup> Weiwei Zhang,<sup>1,2</sup> Yanfen Hao,<sup>1,2</sup> Peijie Zuo,<sup>1,2</sup> Yingming Li,<sup>1</sup> Qinghua Zhang,

<sup>1,2,3,\*</sup> Jianqing Zhang<sup>4,\*</sup> and Guibin Jiang<sup>1,2</sup>

<sup>1</sup>State Key Laboratory of Environmental Chemistry and Ecotoxicology, Research Center for Eco-Environmental Sciences, Chinese Academy of Sciences, Beijing 100085, China

<sup>2</sup>University of Chinese Academy of Sciences, Beijing 100049, China

<sup>3</sup>Institute of Environment and Health, Jiangnan University, Wuhan 430056, China

<sup>4</sup>Shenzhen Center for Disease Control and Prevention, Shenzhen 518055, China

#### **Corresponding author**

\*qhzhang@rcees.ac.cn, Tel: +86 10 6284 9818 (Q. Zhang)

\*969676617@qq.com, Tel: +86 755-25531955 (J. Zhang)

## **Text S1**

### **Instrumental analysis**

Thermal desorption was performed using a commercial desorption unit, TDS-3 (Gerstel) connected to a programmed-temperature vapouriser (PTV) injector/cooled injection system (CIS – 3) (Gerstel) by a heated transfer line. The CIS was equipped with a baffled glass liner and was cooled by liquid nitrogen for analyte trapping prior to injection into a chromatographic column for analytical separation and detection. Moreover, a baffled glass liner has been shown to provide good responses in a number of studies involving SVOCs.<sup>1,2,3</sup> The temperature program for desorption was 30 °C (delay time of 0.2 minutes), then ramped at 130°C/minute to 290°C, held for 10 minutes. The desorption unit, TDS-3 was operated in a splitless mode. The temperature of the transfer line was set at 290°C. The CIS was cooled with liquid nitrogen to 20°C. After desorption and cryotrapping, cryo-desorption was carried out at 10°C per second from 20°C to 295°C, held for 6 minutes, for quantitative sample transfer into the chromatographic column for analyte separation. Meanwhile, the desorbed analytes were being carried in helium gas at 95mLmin<sup>-1</sup>. The CIS was also operated in a splitless mode. The TDS-3 device was connected to a Shimadzu GC coupled to a MS (GCMS-QP2010 Ultra). Gas chromatography/mass spectrometry parameters have been reported in our previous study.<sup>1</sup>

| Experimental Factors and their letter codes |  | Experimental Factor Levels and their codes |  |            |  |           |  |  |
|---------------------------------------------|--|--------------------------------------------|--|------------|--|-----------|--|--|
|                                             |  | Low (-1)                                   |  | Center (0) |  | High (+1) |  |  |
| Desorption Flow (A)                         |  | 20                                         |  | 60         |  | 100       |  |  |
| Desorption Temperature (B)                  |  | 260                                        |  | 290        |  | 320       |  |  |
| TDS Transfer Temperature (C)                |  | 260                                        |  | 290        |  | 320       |  |  |
| Desorption Time (D)                         |  | 5                                          |  | 10         |  | 15        |  |  |
| Cryofocusing Temperature (E)                |  | -100                                       |  | -20        |  | 60        |  |  |
| Cryodesorption Temperature (F)              |  | 260                                        |  | 290        |  | 320       |  |  |
| Cryodesorption Time (G)                     |  | 2                                          |  | 6          |  | 10        |  |  |

  

| Run             | Experimental factor settings at each run |     |     |     |      |     |    | Response Factors (Compound Specific Chromatographic Areas) |           |           |          |          |          |          |          |           |           |
|-----------------|------------------------------------------|-----|-----|-----|------|-----|----|------------------------------------------------------------|-----------|-----------|----------|----------|----------|----------|----------|-----------|-----------|
|                 | A                                        | B   | C   | D   | E    | F   | G  | TEP                                                        | TPP       | TNBP      | TCEP     | TCIPP    | TDCIPP   | TBOEP    | TPHP     | EHDPP     | TEHP      |
| 1               | 100                                      | 320 | 320 | 5   | 60   | 260 | 2  | 451704.5                                                   | 1056466.0 | 675385.5  | 133531.5 | 88479.5  | 45542.0  | 28719.5  | 253084.5 | 453589.0  | 1211914.5 |
| 2               | 100                                      | 260 | 260 | 15  | 60   | 320 | 2  | 526735.5                                                   | 1286762.0 | 830984.0  | 178161.0 | 109761.0 | 63169.0  | 61049.0  | 352863.5 | 621392.5  | 1719607.0 |
| 3               | 20                                       | 260 | 320 | 15  | 60   | 260 | 2  | 408225.0                                                   | 1384418.0 | 1135416.0 | 244902.0 | 145930.0 | 93538.0  | 61170.0  | 499499.0 | 930945.0  | 2315544.0 |
| 4               | 20                                       | 260 | 320 | 5   | 60   | 320 | 10 | 640922.5                                                   | 1687884.0 | 1129207.5 | 220883.5 | 144792.5 | 79661.5  | 55578.5  | 425920.0 | 696135.5  | 2046014.0 |
| 5               | 100                                      | 260 | 320 | 15  | -100 | 260 | 10 | 723155.5                                                   | 1881437.5 | 1251537.0 | 242739.5 | 158709.5 | 90071.0  | 69104.5  | 439617.5 | 927317.5  | 2632893.0 |
| 6 <sup>a</sup>  | 60                                       | 290 | 290 | 10  | -20  | 290 | 6  | 308746.5                                                   | 1324942.5 | 926822.5  | 266503.5 | 124268.5 | 122458.0 | 139601.0 | 626554.5 | 1313301.0 | 3161711.0 |
| 7               | 60                                       | 290 | 290 | 5   | -100 | 260 | 10 | 226337.0                                                   | 1307480.5 | 1028516.0 | 288552.5 | 148598.0 | 98278.5  | 69579.0  | 526802.5 | 962212.5  | 2492056.5 |
| 8 <sup>a</sup>  | 60                                       | 290 | 290 | 10  | -20  | 290 | 6  | 289871.0                                                   | 1455719.0 | 802766.0  | 282503.5 | 112137.0 | 106589.0 | 140179.0 | 560532.0 | 1001512.5 | 2744051.5 |
| 9               | 100                                      | 260 | 320 | 5   | -100 | 320 | 2  | 384496.0                                                   | 1025152.0 | 650979.5  | 56484.0  | 75923.5  | 11046.5  | 4290.5   | 57860.5  | 103947.0  | 378548.5  |
| 10              | 20                                       | 320 | 260 | 5   | 60   | 320 | 2  | 385844.5                                                   | 1115201.0 | 774053.0  | 79814.5  | 89805.5  | 13996.5  | 4086.5   | 70800.5  | 136561.0  | 846249.5  |
| 11 <sup>a</sup> | 60                                       | 290 | 290 | 10  | -20  | 290 | 6  | 263023.0                                                   | 1144365.0 | 694889.0  | 287697.0 | 112258.0 | 111610.0 | 123315.0 | 490482.0 | 991590.0  | 2412535.0 |
| 12              | 20                                       | 260 | 260 | 5.0 | -100 | 260 | 2  | 539502.5                                                   | 1462634.0 | 910382.0  | 128325.5 | 103434.0 | 26100.5  | 9539.0   | 142639.5 | 314977.5  | 1315715.5 |
| 13              | 100                                      | 320 | 260 | 15  | -100 | 260 | 2  | 316586.5                                                   | 1407336.5 | 1058002.0 | 289870.0 | 146214.5 | 111634.0 | 84859.5  | 563080.5 | 1125788.0 | 2908618.5 |
| 14              | 20                                       | 260 | 260 | 15  | -100 | 320 | 10 | 255369.5                                                   | 1198366.5 | 705135.5  | 12251.0  | 47336.0  | 3121.0   | 1669.0   | 17755.0  | 24012.5   | 98961.0   |
| 15              | 20                                       | 320 | 260 | 15  | 60   | 260 | 10 | 309795.0                                                   | 851746.0  | 524690.0  | 28150.0  | 62033.0  | 6275.0   | 779.0    | 20107.0  | 39216.0   | 437800.0  |
| 16              | 20                                       | 320 | 320 | 15  | -100 | 320 | 2  | 300141.5                                                   | 1365388.5 | 942845.0  | 300560.0 | 134072.5 | 121387.5 | 93982.5  | 597146.5 | 1141368.0 | 2759217.5 |
| 17              | 100                                      | 320 | 260 | 5   | -100 | 320 | 10 | 793397.0                                                   | 2077767.5 | 1455719.5 | 328124.0 | 187987.5 | 134800.5 | 114968.0 | 754426.5 | 1463732.0 | 3619735.0 |
| 18              | 100                                      | 260 | 260 | 5   | 60   | 260 | 10 | 408328.5                                                   | 1401793.0 | 990983.0  | 209843.0 | 123675.0 | 82130.0  | 61808.5  | 448626.0 | 802767.5  | 2182119.5 |
| 19              | 100                                      | 320 | 320 | 15  | 60   | 320 | 10 | 272184.0                                                   | 1121369.5 | 928838.0  | 236523.5 | 131648.0 | 86856.5  | 53871.5  | 441180.0 | 856743.0  | 2071634.0 |

<sup>a</sup> refers to the center points of the screening design.

**Table S1.** Experimental factors, codes, and levels in the 2<sup>7-3</sup> eighth fractional factorial design and the corresponding average compound peak areas.

| Experimental Factors and Letter Codes    |       |        |       | Experimental Factor Levels and their codes                 |           |            |           |           |           |          |           |          |           |
|------------------------------------------|-------|--------|-------|------------------------------------------------------------|-----------|------------|-----------|-----------|-----------|----------|-----------|----------|-----------|
|                                          |       |        |       | Low (-1)                                                   |           | Center (0) |           | High (+1) |           |          |           |          |           |
| Desorption Flow (A)                      |       |        |       | 20                                                         |           | 60         |           | 100       |           |          |           |          |           |
| Cryofocusing Temperature (B)             |       |        |       | -100                                                       |           | -20        |           | 60        |           |          |           |          |           |
| Cryodesorption Temperature (C)           |       |        |       | 260                                                        |           | 290        |           | 320       |           |          |           |          |           |
| Experimental factor settings at each run |       |        |       | Response Factors (Compound Specific Chromatographic Areas) |           |            |           |           |           |          |           |          |           |
| Run                                      | A     | B      | C     | TEP                                                        |           | TPP        |           | TNBP      |           | TCEP     |           | TCIPP    |           |
|                                          |       |        |       | Actual                                                     | Predicted | Actual     | Predicted | Actual    | Predicted | Actual   | Predicted | Actual   | Predicted |
| 1                                        | 20.0  | -20.0  | 320.0 | 922208.0                                                   | 1170880.0 | 2341327.0  | 3001260.0 | 1516043.5 | 1917380.0 | 312759.5 | 374208.0  | 159056.5 | 197382.0  |
| 2                                        | 60.0  | -100.0 | 260.0 | 857785.0                                                   | 877999.0  | 2238820.0  | 2621740.0 | 1414727.5 | 1722920.0 | 237028.5 | 258081.0  | 160049.0 | 190166.0  |
| 3                                        | 20.0  | -100.0 | 290.0 | 710402.0                                                   | 615658.0  | 2474229.5  | 2230460.0 | 1761650.5 | 1607190.0 | 294577.0 | 251074.0  | 193083.5 | 184836.0  |
| 4                                        | 100.0 | -20.0  | 320.0 | 1695451.5                                                  | 1620920.0 | 4424775.5  | 4563920.0 | 2803856.5 | 2957600.0 | 590934.0 | 568484.0  | 290491.0 | 312360.0  |
| 5 <sup>a</sup>                           | 60.0  | -20.0  | 290.0 | 1507348.0                                                  | 1606140.0 | 4047543.5  | 4484590.0 | 2580844.5 | 2936570.0 | 498191.0 | 548977.0  | 272580.0 | 314910.0  |
| 6 <sup>a</sup>                           | 60.0  | -20.0  | 290.0 | 1588502.5                                                  | 1606140.0 | 4340267.5  | 4484590.0 | 2805147.0 | 2936570.0 | 519892.5 | 548977.0  | 291682.0 | 314910.0  |
| 7                                        | 100.0 | -20.0  | 260.0 | 1629748.5                                                  | 1381080.0 | 4598243.0  | 3938310.0 | 2980115.0 | 2578780.0 | 613775.5 | 552327.0  | 328037.5 | 289713.0  |
| 8                                        | 20.0  | 60.0   | 290.0 | 617384.0                                                   | 388925.0  | 3503504.5  | 3226480.0 | 2353480.5 | 2260340.0 | 478381.0 | 437985.0  | 252880.0 | 244672.0  |
| 9                                        | 60.0  | 60.0   | 320.0 | 481635.5                                                   | 461421.0  | 4113335.5  | 3730420.0 | 2992992.5 | 2684800.0 | 671822.5 | 650770.0  | 321764.5 | 291648.0  |
| 10                                       | 60.0  | 60.0   | 260.0 | 236390.5                                                   | 390320.0  | 3567739.0  | 3983910.0 | 2731648.5 | 2978530.0 | 684918.5 | 702864.0  | 328521.5 | 358599.0  |
| 11                                       | 100.0 | -100.0 | 290.0 | 941389.0                                                   | 1169850.0 | 2952669.0  | 3229690.0 | 1955490.5 | 2048630.0 | 207962.0 | 248358.0  | 209483.5 | 217692.0  |
| 12                                       | 60.0  | -100.0 | 320.0 | 1114979.5                                                  | 961050.0  | 3466242.5  | 3050070.0 | 2352306.0 | 2105430.0 | 353064.0 | 335118.0  | 269365.5 | 239288.0  |
| 13                                       | 100.0 | 60.0   | 290.0 | 314529.5                                                   | 409273.0  | 4032421.5  | 4276190.0 | 3075998.5 | 3230460.0 | 778378.5 | 821881.0  | 370401.5 | 378649.0  |
| 14                                       | 20.0  | -20.0  | 260.0 | 1182047.0                                                  | 1256580.0 | 3591177.0  | 3452030.0 | 2361172.0 | 2207430.0 | 342973.0 | 365423.0  | 259728.0 | 237859.0  |
| 15 <sup>a</sup>                          | 60.0  | -20.0  | 290.0 | 1722575.0                                                  | 1606140.0 | 5065956.0  | 4484590.0 | 3423728.0 | 2936570.0 | 628848.0 | 548977.0  | 380469.0 | 314910.0  |

  

| Run             | A     | B      | C     | TDCIPP   |           | TBOEP    |           | TPHP      |           | EHDPP     |           | TEHP      |           |
|-----------------|-------|--------|-------|----------|-----------|----------|-----------|-----------|-----------|-----------|-----------|-----------|-----------|
|                 |       |        |       | Actual   | Predicted | Actual   | Predicted | Actual    | Predicted | Actual    | Predicted | Actual    | Predicted |
| 1               | 20.0  | -20.0  | 320.0 | 112062.5 | 136903.0  | 116688.0 | 109911.0  | 470025.0  | 564627.0  | 1057562.5 | 1195010.0 | 3310298.0 | 3938950.0 |
| 2               | 60.0  | -100.0 | 260.0 | 38897.0  | 42543.6   | 18023.0  | 6039.5    | 153062.0  | 144445.0  | 463195.0  | 488782.0  | 2217466.0 | 2727000.0 |
| 3               | 20.0  | -100.0 | 290.0 | 69213.5  | 58102.9   | 40123.5  | 31391.8   | 308220.0  | 297996.0  | 714784.0  | 626298.0  | 3327482.5 | 3121420.0 |
| 4               | 100.0 | -20.0  | 320.0 | 235183.5 | 227719.0  | 221664.5 | 200949.0  | 999300.0  | 980459.0  | 2158696.0 | 2095800.0 | 6533647.0 | 6837110.0 |
| 5 <sup>a</sup>  | 60.0  | -20.0  | 290.0 | 198883.0 | 219836.0  | 157377.0 | 174225.0  | 812895.0  | 922826.0  | 1881157.5 | 2122790.0 | 6119793.0 | 6921490.0 |
| 6 <sup>a</sup>  | 60.0  | -20.0  | 290.0 | 205903.5 | 219836.0  | 159285.0 | 174225.0  | 823900.5  | 922826.0  | 1992677.0 | 2122790.0 | 6740108.0 | 6921490.0 |
| 7               | 100.0 | -20.0  | 260.0 | 219622.5 | 194782.0  | 163279.5 | 170057.0  | 870684.5  | 776083.0  | 2086644.0 | 1949190.0 | 6206228.5 | 5577570.0 |
| 8               | 20.0  | 60.0   | 290.0 | 196239.5 | 175045.0  | 121144.0 | 115938.0  | 796777.5  | 693559.0  | 1581362.0 | 1469500.0 | 5166159.0 | 5047030.0 |
| 9               | 60.0  | 60.0   | 320.0 | 262223.5 | 258577.0  | 234485.5 | 246469.0  | 1029696.0 | 1038310.0 | 2527982.5 | 2502400.0 | 7560157.0 | 7050630.0 |
| 10              | 60.0  | 60.0   | 260.0 | 259307.0 | 273037.0  | 247585.5 | 232077.0  | 1009825.5 | 1094200.0 | 2618338.0 | 2667300.0 | 7450197.0 | 7872790.0 |
| 11              | 100.0 | -100.0 | 290.0 | 50428.0  | 71622.3   | 15071.0  | 20277.3   | 254986.5  | 358205.0  | 451951.0  | 563815.0  | 3112110.0 | 3231230.0 |
| 12              | 60.0  | -100.0 | 320.0 | 125466.0 | 111736.0  | 60761.5  | 76270.4   | 631771.5  | 547394.0  | 1056406.5 | 1007440.0 | 4840960.0 | 4418370.0 |
| 13              | 100.0 | 60.0   | 290.0 | 320904.0 | 332015.0  | 323235.5 | 331967.0  | 1393097.0 | 1403320.0 | 3305604.5 | 3394090.0 | 8877605.5 | 9083670.0 |
| 14              | 20.0  | -20.0  | 260.0 | 107645.0 | 115109.0  | 35465.0  | 56180.2   | 403102.0  | 421943.0  | 924965.0  | 987865.0  | 4632754.0 | 4329290.0 |
| 15 <sup>a</sup> | 60.0  | -20.0  | 290.0 | 254722.5 | 219836.0  | 206013.0 | 174225.0  | 1131682.0 | 922826.0  | 2494531.5 | 2122790.0 | 7904560.0 | 6921490.0 |

<sup>a</sup> refers to the center points of the screening design.

**Table S2.** Box-Behnken response surface design matrix and the corresponding average (actual and model predicted) compound peak areas

**Table S3**

Analysis of variance (ANOVA) of the response surface regression model for EHDPP.

| Source                       | Sum of squares | Degrees of freedom | Mean square | F-ratio | p-value |
|------------------------------|----------------|--------------------|-------------|---------|---------|
| A:Desorption flow            | 1.73373E12     | 1                  | 1.73373E12  | 28.33   | 0.0031  |
| B:Cryofocusing Temperature   | 6.74721E12     | 1                  | 6.74721E12  | 110.25  | 0.0001  |
| C:Cryodesorption Temperature | 6.25705E10     | 1                  | 6.25705E10  | 1.02    | 0.3584  |
| AA                           | 4.77031E11     | 1                  | 4.77031E11  | 7.79    | 0.0384  |
| AB                           | 9.87117E11     | 1                  | 9.87117E11  | 16.13   | 0.0102  |
| AC                           | 9.16439E8      | 1                  | 9.16439E8   | 0.01    | 0.9074  |
| BB                           | 2.3063E11      | 1                  | 2.3063E11   | 3.77    | 0.1099  |
| BC                           | 1.16816E11     | 1                  | 1.16816E11  | 1.91    | 0.2256  |
| CC                           | 1.5727E11      | 1                  | 1.5727E11   | 2.57    | 0.1698  |
| Lack of fit                  | 1.197E12       | 6                  | 1.996E11    | 1.869   | 0.389   |
| Pure error                   | 2,135E11       | 2                  | 1.068E11    |         |         |
| Total error                  | 3.05997E11     | 5                  | 6.11994E10  |         |         |
| Total (corr.)                | 1.07139E13     | 14                 |             |         |         |

R-squared = 97.1439 percent

R-squared (adjusted for d.f.) = 92.003 percent

Standard Error of Est. = 247385.

Mean absolute error = 112933.

Durbin-Watson statistic = 1.48657 (P=0.2925)

Lag 1 residual autocorrelation = 0.0000359516

**Table S3.** Analysis of variance (ANOVA) of the response surface regression model for EHDPP.

| No | Compound                              | Practical Abbreviation (PRAB) | B.p (°C) | Structure                                                                           | CAS Number | MW     | Log $K_{ow}$ | Koc    | Vapour Pressure (Pa) | Log $K_{OA}$ |
|----|---------------------------------------|-------------------------------|----------|-------------------------------------------------------------------------------------|------------|--------|--------------|--------|----------------------|--------------|
| 1  | Triethyl phosphate                    | TEP                           | 216      | 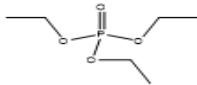   | 78-40-0    | 182.16 | 0.80         | 36     | 5.25E+01             | 6.1          |
| 2  | Tri-n-propyl phosphate                | TPP                           | 254      |    | 513-08-6   | 224.24 | 1.87         | 676    | 5.77E-01             | 6.4          |
| 3  | Tri-n-butyl phosphate                 | TNBP                          | 289      |    | 126-73-8   | 266.32 | 3.60         | 977    | 1.71E00              | 8.2          |
| 4  | Tris(2-chloroethyl) phosphate         | TCEP                          | 351      |    | 115-96-8   | 285.49 | 1.47         | 150    | 1.44E-02             | 7.4          |
| 5  | Tris(2-chloroisopropyl)phosphate      | TCIPP                         | 342      |    | 13674-84-5 | 327.56 | 2.59         | 275    | 2.69E-03             | 8.2          |
| 6  | Tris(1,3-dichloro-2-propyl) phosphate | TDCIPP                        | 457      |    | 13674-87-8 | 430.90 | 3.27         | 1440   | 5.43E-06             | 10.6         |
| 7  | Tris(2-butoxyethyl) phosphate         | TBOEP                         | 414      |    | 78-51-3    | 398.48 | 3.75         | 1020   | 3.33E-06             | 13.1         |
| 8  | Triphenyl phosphate                   | TPHP                          | 370      |  | 115-86-6   | 326.29 | 4.59         | 2630   | 8.37E-03             | 8.5          |
| 9  | 2-Ethylhexyl diphenyl phosphate       | EHDPP                         | 375      |  | 1241-94-7  | 362.40 | 5.73         | 9499   | 6.20E-04             | 11.3         |
| 10 | Tris(2-ethylhexyl) phosphate          | TEHP                          | 220      |  | 78-42-2    | 434.64 | 9.49         | 617000 | 1.10E-05             | 15.0         |

**Table S4.** Names, abbreviations, structures and other properties of the target compounds

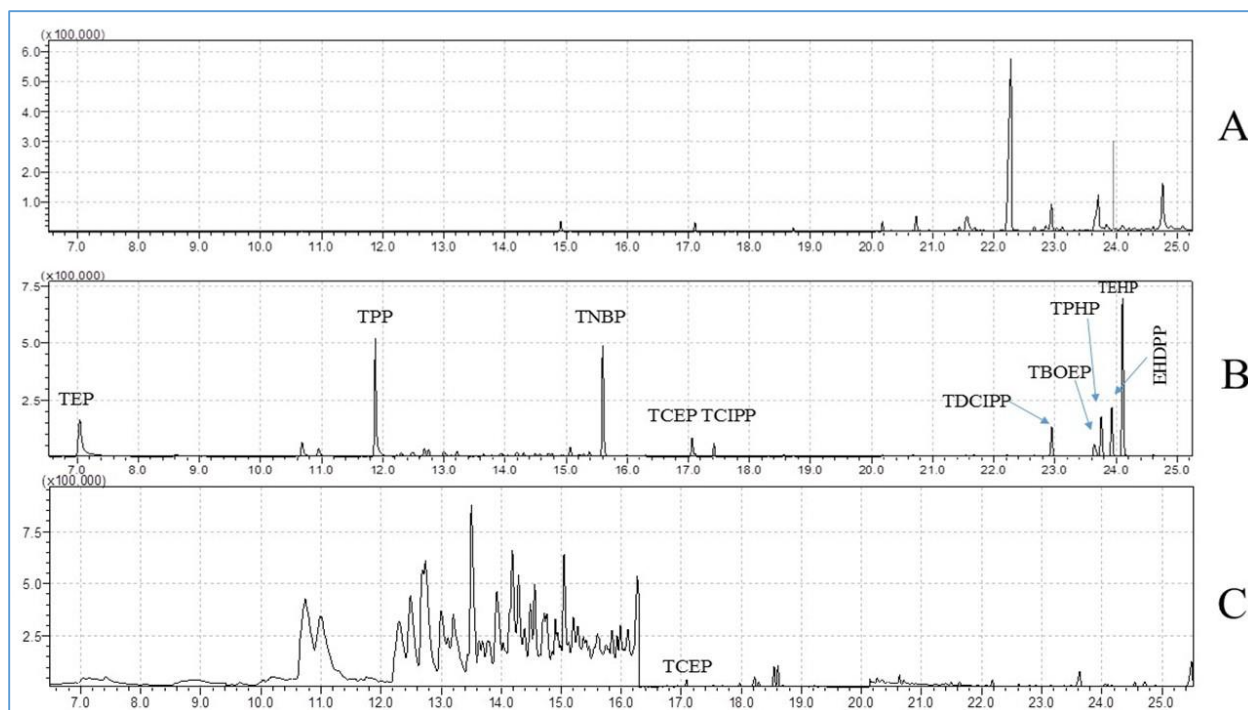

**Figure S1.** Total Ion Chromatograms (TIC) laboratory blank tube (A), intermediate calibration concentration level (B) and real air sample collected from the car (C)

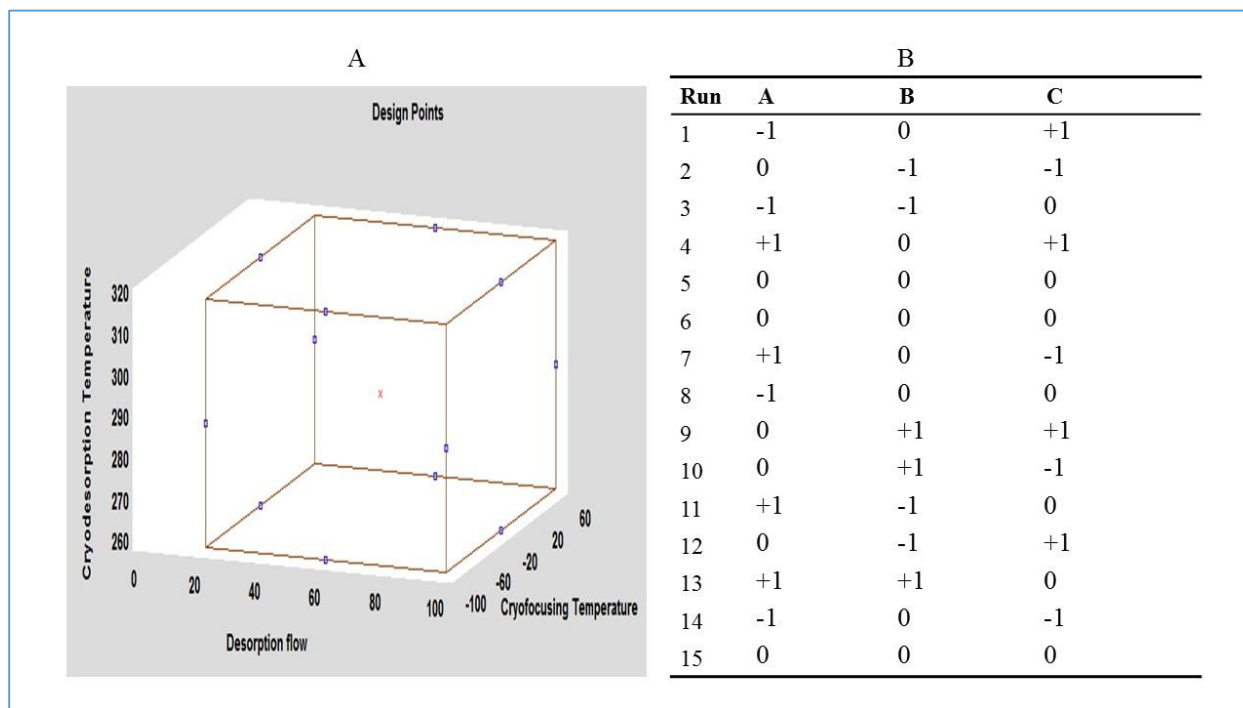

**Figure S2.** Box-Benken Design plot (A) and Matrix codes (B).

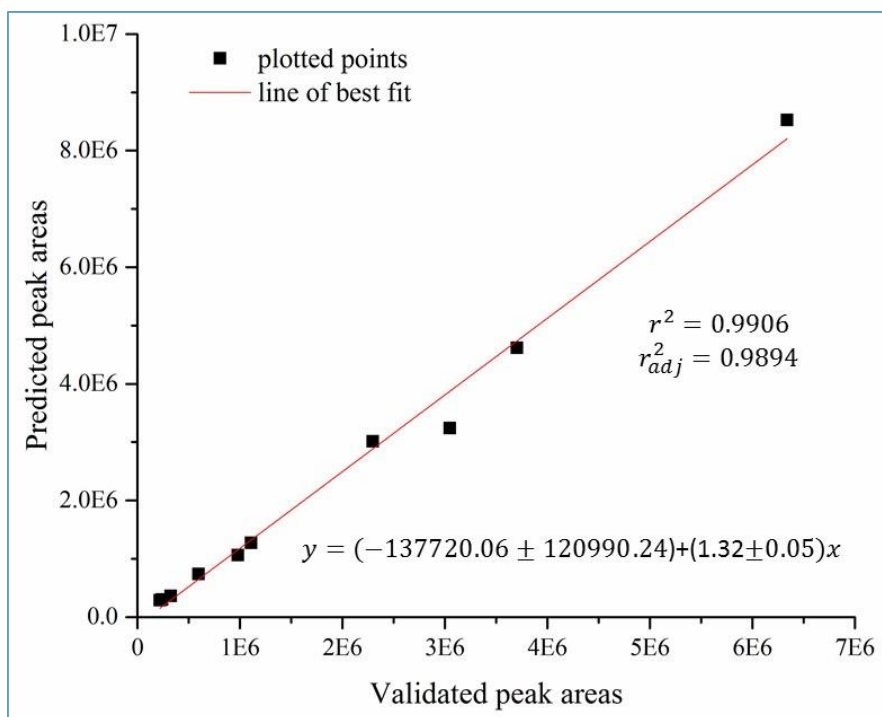

**Figure S3.** Scatter plot illustrating the relationship the modelled and experimental/validated peak areas.

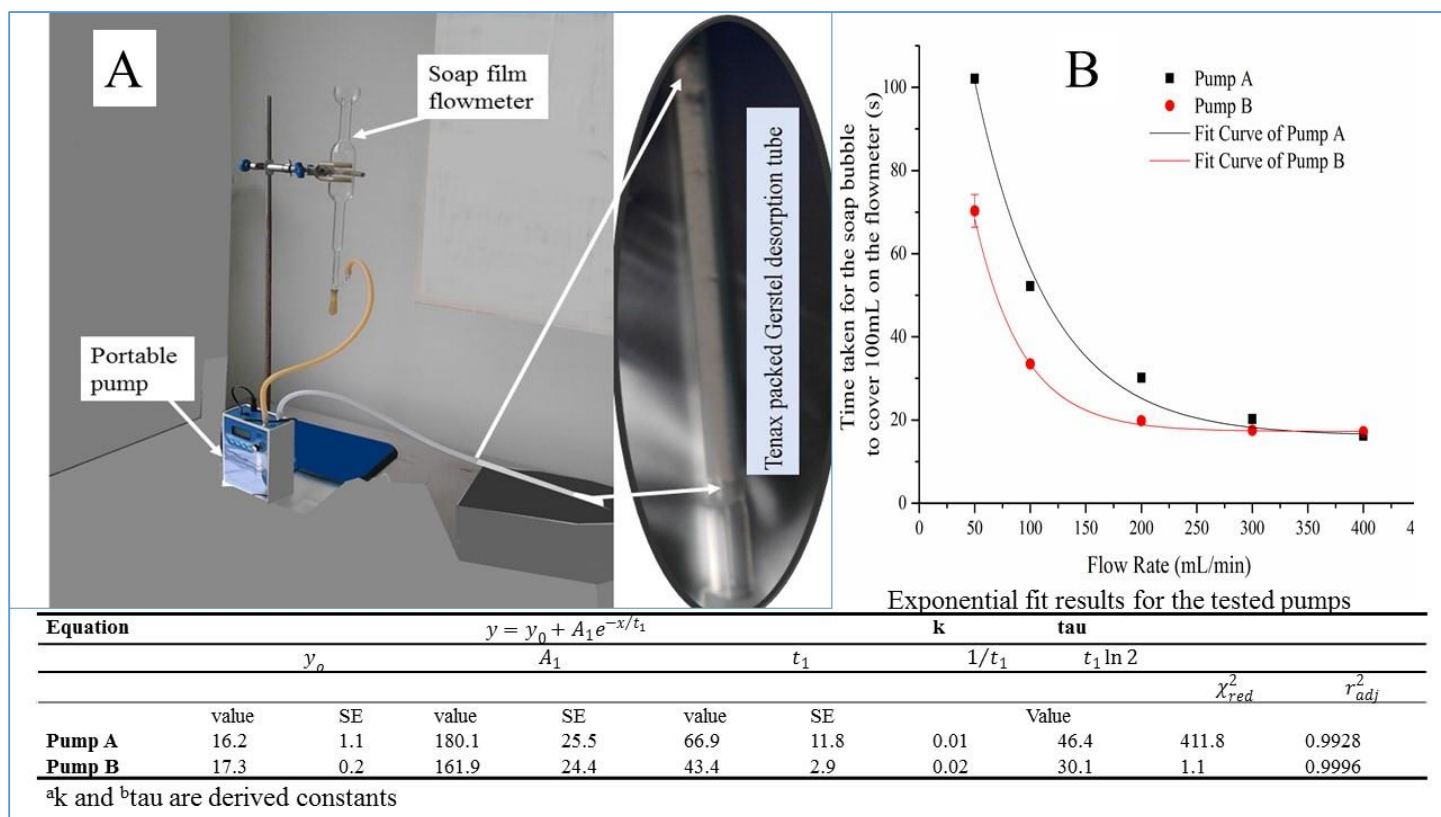

**Figure S4.** Calibration set up (A) and calibration curves (B, n=3) for the two tested QC-IC pumps.



## References

1. Matsiko, J. et al. Stir bar sorptive extraction and thermal desorption - gas chromatography/mass spectrometry for determining phosphorus flame retardants in air samples. *Anal. Methods* **10**, 1918-1927 (2018).
2. León, V.M., Álvarez, B., Cobollo, M.A., Muñoz, S. & Valor, I. Analysis of 35 priority semivolatile compounds in water by stir bar sorptive extraction–thermal desorption–gas chromatography–mass spectrometry: I. Method optimisation. *J. Chromatogr., A* **999**, 91-101 (2003).
3. Cacho, J.I., Campillo, N., Viñas, P. & Hernández-Córdoba, M. Stir bar sorptive extraction coupled to gas chromatography–mass spectrometry for the determination of bisphenols in canned beverages and filling liquids of canned vegetables. *J. Chromatogr., A* **1247**, 146-153 (2012).
